# Supplementary material for: Hydroiodic acid treated PEDOT:PSS thin film as transparent electrode: an approach towards ITO free organic photovoltaics
Source: Royal Society of Chemistry journal article supplement (doi:10.1039/c5ra07136d), 2015-01-01
Supplement: c5ra07136d1.pdf [file c5ra07136d1.pdf]

## Supporting Information

For

### Hydroiodic Acid Treated PEDOT:PSS Thin Film as Transparent Electrode: An Approach Towards ITO Free Organic Photovoltaics

Ashis K. Sarker,<sup>‡\*a</sup> Jaehoon Kim,<sup>‡a</sup> Boon-Hong Wee,<sup>b</sup> Hyung-Jun Song,<sup>a</sup> Yeonkyung Lee,<sup>a</sup>

Jong-Dal Hong<sup>b</sup> and Changhee Lee<sup>\*a</sup>

<sup>a</sup>Department of Electrical and Computer Engineering, Global Frontier for Multiscale Energy Systems, Seoul National University, Seoul 151-742, Republic of Korea

<sup>b</sup>Department of chemistry, Research Institute of Natural Sciences, Incheon National University, 119 Academy-ro, Yeonsu-gu, Incheon, 406-772, Republic of Korea.

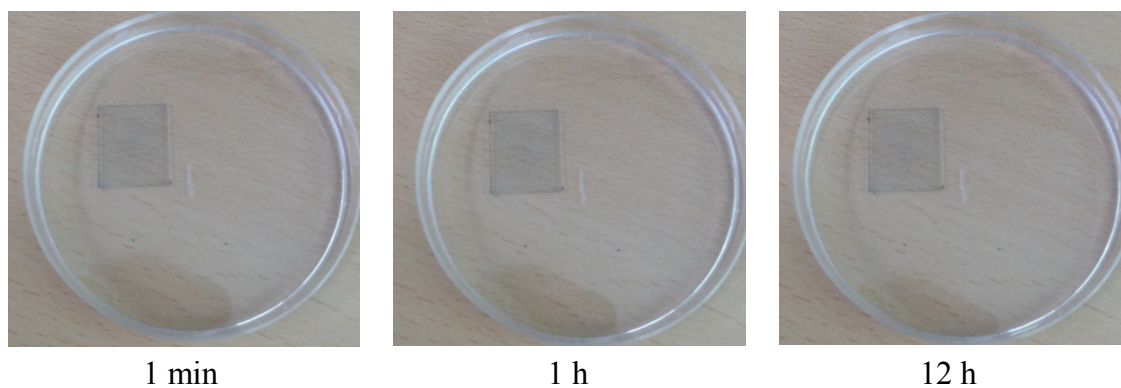

**Figure S1.** HI treated PEDOT:PSS film dipped into water. The film was highly stable even after 12 h.

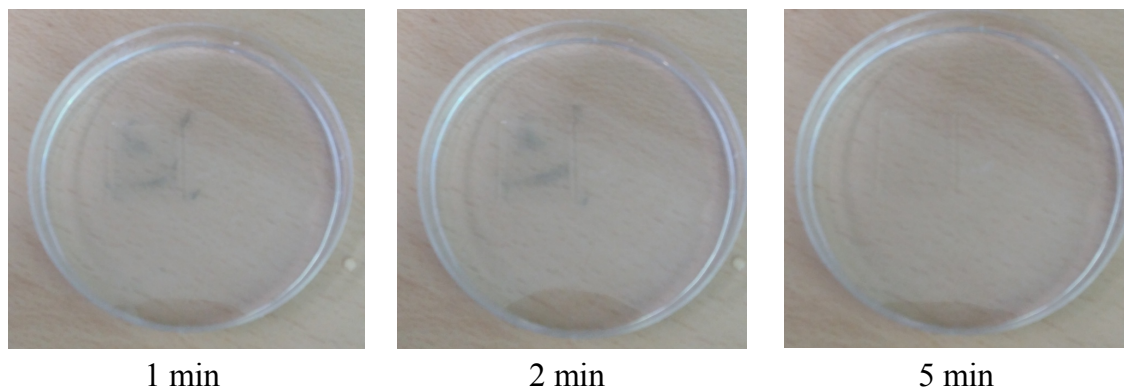

**Figure S2.** As prepared PEDOT:PSS film dipped into water. The film was completely peeled off the glass substrate and dissolved in water just after 5 min.

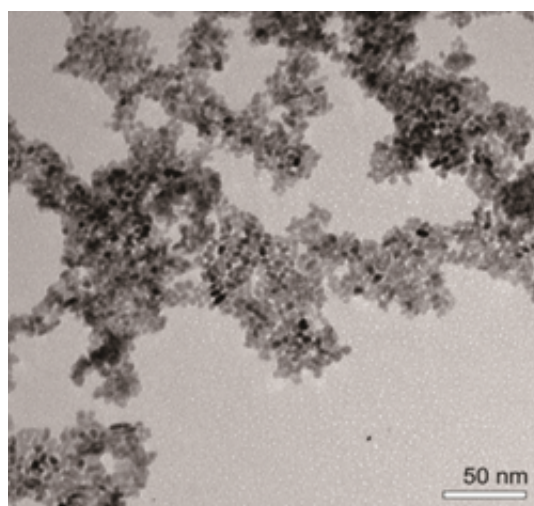

**Figure S3.** Transmission electron microscopic image of ZnO nanoparticle.

**Table S1:** The sheet resistance and transmittance of PEDOT:PSS films with different number of layers after multiple treatments.

| Number of layer | Sheet resistance (ohm/sq) | Transmittance (%) at550 nm |
|-----------------|---------------------------|----------------------------|
| 1               | 233                       | 95                         |
| 2               | 95                        | 92                         |
| 3               | 62                        | 88                         |
| 4               | 47                        | 81                         |
| 5               | 37                        | 72                         |

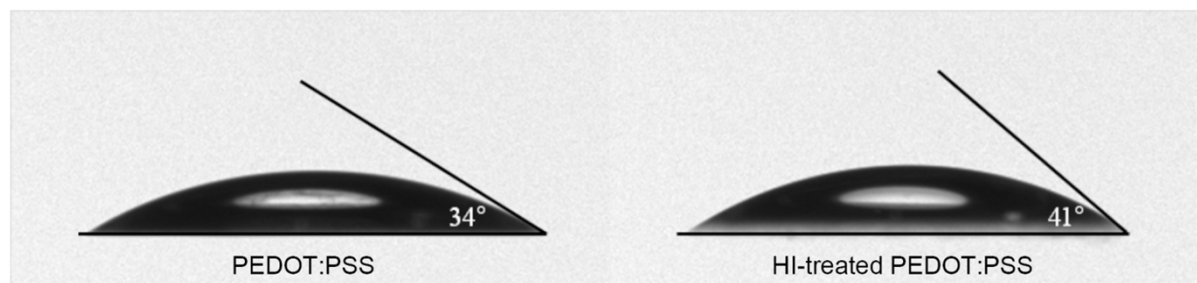

**Figure S4.** Droplets of deionized water on pristine and HI treated PEDOT:PSS.

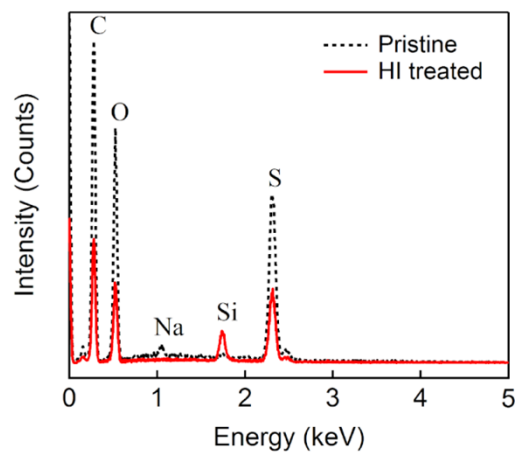

**Figure S5.** Energy-dispersive x-ray spectra of pristine and HI treated PEDOT:PSS films.

Energy-dispersive x-ray spectroscopy (EDS) analysis showed that three different elements, C, O, S exist both for pristine PEDOT:PSS and HI treated PEDOT:PSS (**Fig. S5**). The HI has a strong peak intensity at about 4 KeV characteristic of I group. The absence of such a band in the EDS spectra of the HI acid treated PEDOT:PSS films suggest that no iodine remains in the PEDOT:PSS films.

**Table S2.** Additives and their effect on the conductivity of PEDOT:PSS films.

| <b>Dopant</b>        | <b>Pre/post treatment</b> | <b>Conductivity (S/cm)</b> | <b>Ref.</b> |
|----------------------|---------------------------|----------------------------|-------------|
| Dimethylene glycol   | Pre                       | 10                         | 1           |
| Sorbitol/NMP/IPA     | Pre                       | 48                         | 2           |
| DMSO                 | Pre                       | 80                         | 3           |
| Salt                 | Post                      | 100                        | 4           |
| Zwitter ion          | Post                      | 100                        | 5           |
| IPA/H <sub>2</sub> O | Post                      | 103                        | 6           |
| Ionic liquid         | Pre                       | 136                        | 7           |
| DMS                  | Pre                       | 140                        | 8           |
| Salt                 | Post                      | 187                        | 9           |
| Sulfurous acid       | Post                      | 200                        | 10          |
| DMSO                 | Pre                       | 680                        | 11          |
| Ionic surfactant     | Pre                       | 900                        | 12          |
| HI                   | Post                      | 1100                       | This work   |

## References

1. X. Crispin, F. L. E. Jakobsson, A. Crispin, P. C. M. Grim, P. Andersson, A. Volodin, C. V. Haesendonck, M. V. Auweraer, W. R. Salaneck and M. Berggren, *Chem. Mater.*, 2006, **18**, 4354-4360.
2. S. K. M. Jonsson, J. Birgersson, X. Crisp, G. Greczynski, W. Osikowicz, A. W. D. Gon, W. R. Salaneck, M. Fahlman, *Synth. Met.*, 2003, **139**, 1-10.
3. J. Y. Kim, J. H. Jung, D. E. Lee and J. Joo, *Synth. Met.*, 2002, **126**, 311-316.
4. Y. Xia and J. Ouyang, *Macromolecules*, 2009, **42**, 4141-4147.

5. Y. Xia, H. Zhang and J. Ouyang, *J. Mater. Chem.*, 2010, **20**, 9740-9747.
6. Y. Xia and J. Ouyang, *J. Mater. Chem.*, 2011, **21**, 4927-4936.
7. M. Döbbelin, R. Marcilla, M. Salsamendi, C. Pozo-Gonzalo, P. M. Carrasco, J. A. Pomposo and D. Mecerreyes, *Chem. Mater.*, 2007, **19**, 2147-2149.
8. M. Reyes-Reyes, I. Cruz-Cruz and R. López-Sandoval, *J. Phys. Chem. C*, 2010, **114**, 20220-20224.
9. Y. Xia and J. Ouyang, *Organic Electronics*, 2010, **11**, 1129-1135.
10. Y. Xia and J. Ouyang, *ACS Applied Materials & Interfaces*, 2010, **2**, 474-483.
11. Y. Zhou, H. Cheun, S. Choi, W. J. Potscavage, C. F. Hernandez and B. Kippelen, *Appl. Phys. Lett.*, 2010, **97**, 153304.
12. B. Fan, X. Mei and J. Ouyang, *Macromolecules*, 2008, **41**, 5971-5973.
